# Supplementary material for: Technology-based group exercise interventions for people living with dementia or mild cognitive impairment: a scoping review protocol
Source: PubMed Central journal article supplement — BMJ Open. 2022 Mar 28;12(3):e055990. doi: 10.1136/bmjopen-2021-055990 (PMC8961146; doi:10.1136/bmjopen-2021-055990), 2022-03-28

# BMJ Open

BMJ Open is committed to open peer review. As part of this commitment we make the peer review history of every article we publish publicly available.

When an article is published we post the peer reviewers' comments and the authors' responses online. We also post the versions of the paper that were used during peer review. These are the versions that the peer review comments apply to.

The versions of the paper that follow are the versions that were submitted during the peer review process. They are not the versions of record or the final published versions. They should not be cited or distributed as the published version of this manuscript.

BMJ Open is an open access journal and the full, final, typeset and author-corrected version of record of the manuscript is available on our site with no access controls, subscription charges or pay-per-view fees (<http://bmjopen.bmj.com>).

If you have any questions on BMJ Open's open peer review process please email [info.bmjopen@bmj.com](mailto:info.bmjopen@bmj.com)

# BMJ Open

## Technology-Based Group Exercise Interventions for People Living with Dementia: A Scoping Review Protocol

|                               |                                                                                                                                                                                                                                                                                                                                                                                      |
|-------------------------------|--------------------------------------------------------------------------------------------------------------------------------------------------------------------------------------------------------------------------------------------------------------------------------------------------------------------------------------------------------------------------------------|
| Journal:                      | <i>BMJ Open</i>                                                                                                                                                                                                                                                                                                                                                                      |
| Manuscript ID                 | bmjopen-2021-055990                                                                                                                                                                                                                                                                                                                                                                  |
| Article Type:                 | Protocol                                                                                                                                                                                                                                                                                                                                                                             |
| Date Submitted by the Author: | 02-Aug-2021                                                                                                                                                                                                                                                                                                                                                                          |
| Complete List of Authors:     | Hung, Lillian; University of British Columbia; Vancouver General Hospital<br>Levine, Hannah; Florida Atlantic University Charles E Schmidt College of<br>Medicine<br>Randhawa, Paavan; Langara College<br>Park, Juyoung; Florida Atlantic University, Phyllis and Harvey Sandler<br>School of Social Work; Florida Atlantic University, College of Social Work<br>& Criminal Justice |
| Keywords:                     | Dementia < NEUROLOGY, Telemedicine < BIOTECHNOLOGY &<br>BIOINFORMATICS, World Wide Web technology < BIOTECHNOLOGY &<br>BIOINFORMATICS, GERIATRIC MEDICINE                                                                                                                                                                                                                            |
|                               |                                                                                                                                                                                                                                                                                                                                                                                      |

SCHOLARONE™  
Manuscripts

1  
2  
3 **Title: Technology-Based Group Exercise Interventions for People Living with Dementia: A**  
4 **Scoping Review Protocol**  
5  
6

7 Lillian Hung<sup>1</sup> Hannah Levine<sup>2</sup> Paavan Randhawa<sup>3</sup> Juyoung Park<sup>4</sup>  
8  
9

10  
11 <sup>1</sup>School of Nursing, University of British Columbia, Vancouver, British Columbia, Canada

12 <sup>2</sup>Charles E. Schmidt College of Medicine, Florida Atlantic University, Boca Raton, Florida,  
13 USA

14 <sup>3</sup>Faculty of General Sciences, Langara College, Vancouver, British Columbia, Canada

15 <sup>4</sup>Phyllis & Harvey Sandler School of Social Work, College of Social Work & Criminal Justice,  
16 Florida Atlantic University, Boca Raton, Florida, USA  
17  
18

19  
20  
21  
22  
23  
24  
25  
26  
27 Corresponding author:  
28

29 Hannah Levine

30 Charles E. Schmidt College of Medicine, Florida Atlantic University, Boca Raton, Florida, USA,

31 Email: hlevine2016@health.fau.edu  
32  
33  
34

35 Declarations of interests: none.  
36  
37  
38  
39  
40  
41  
42  
43  
44  
45  
46  
47  
48  
49  
50  
51  
52  
53  
54  
55

## ABSTRACT

**Introduction** More than 50 million people worldwide are living with dementia in 2020, and this number is expected to double every 20 years. Physical exercise has been a growing field in nonpharmacological interventions for dementia care. Due to public health measures during the COVID-19 pandemic, more people have considered adapting to technology-based exercise via digital devices. This scoping review will explore the evidence relating to the use of technology-based group exercise among people with dementia.

**Methods and analysis** This review will follow the Joanna Briggs Institute scoping review methodology between June 2021 and December 2021. This review will focus on all people with dementia with the intent to identify what types of technology-based group exercise interventions exist for people with dementia. The review will provide a synthesis of current evidence on the outcome and impacts of technology-based group exercise. The context of this review will include homes, assisted living facilities, and memory care services, and exclude hospitals. The review will include a three-step search strategy: (a) identify keywords from MEDLINE and Embase; (b) search using the identified keywords in databases (MEDLINE/PubMed, CINAHL, Web of Science, Embase, Cochrane Library, and PsychInfo, and Google); and (c) review references from included studies to identify additional studies. Only studies in English will be included. Two researchers will independently assess titles and abstracts and then review the full text of the selected articles, applying the inclusion criteria. The extracted data will be presented in tables and summarized narratively.

1  
2  
3 **Ethics and dissemination** Scoping review data will be collected from publicly available articles;  
4  
5 research ethics approval is not required. The findings will be disseminated to healthcare  
6  
7 practitioners and the public through a peer-reviewed publication and conference presentations.  
8  
9

10  
11 **KEYWORDS:** Dementia, telemedicine, world wide web technology, geriatric medicine.  
12  
13

#### 14 **STRENGTHS AND LIMITATIONS OF THIS STUDY**

15

- 16  
17  
18 • This scoping review will follow the Joanna Briggs Institute Scoping Review Manual to  
19  
20 ensure scientific rigour  
21  
22
- 23  
24  
25 • Patient and family partners will be involved in conducting the scoping review study  
26  
27
- 28  
29 • The review will be limited to literature published in English; publications in other  
30  
31 language will not be considered.  
32  
33
- 34  
35 • Because the focus of this review is on technology-based group exercise people with  
36  
37 dementia living in the community, exercise programs in acute care services will not be  
38  
39 captured.  
40  
41  
42  
43  
44  
45  
46  
47  
48  
49  
50  
51  
52  
53  
54  
55

## INTRODUCTION

Dementia is a neurodegenerative condition characterized by progressive deterioration of cognitive function, often affecting memory, thinking, judgment, personality, and visuospatial skills, among many other possible deficits[1]. In addition to cognitive impairment, due to its progressive degenerative nature, dementia leads to physical decline in balance, gait, and movement coordination, behavioral and psychological symptoms of dementia (BPSD), and social disability[2,3]. Dementia can be divided based on etiology; Alzheimer's disease (AD) is the most common type of dementia, followed by other types, such as vascular dementia, Lewy body dementia, frontotemporal dementia, and Parkinson's disease[1]. It is a widespread health issue, globally affecting more than 50 million people, with more than 10 million new cases every year[4].

Although the number of people with dementia is increasing worldwide, no curative treatment is currently available and effective palliative treatments are lacking. Antipsychotic medications used to manage BPSD in people with dementia, in particular older adults, can cause adverse events such as oversedation, psychomotor impairment, Parkinsonian symptoms, stroke, or falls, all of which can contribute to admission to the emergency department or long-term care facilities, and increased health care costs[5,6]. Evidence-based, safe, and effective nonpharmacologic treatments are needed to relieve dementia symptoms and/or delay progression of the severity of the disease. Group exercise programs, such as chair yoga, and tai-chi, have shown positive effects in managing dementia symptoms[7-10].

Meta-analyses have shown overall benefits of various types of physical exercise on

1  
2  
3 physical function and BPSD in people with dementia [11]. However, people living with  
4 dementia face challenges to participate in exercise groups due to restricted range of motion,  
5 declined cognition and balance, and risk of falls [2,8,9]. Major barriers to physical exercise in  
6 this population could include lack of accessible opportunities, transportation to community sites  
7 where exercise classes are offered, and limited support from caregivers [7,12,13]. Compared to  
8 people without cognitive impairment, people with dementia are more likely to experience social  
9 isolation and loneliness, which has been linked to increased depression, cardiovascular risk, and  
10 overall detrimental effects to quality of life[14,15]. Group exercise programs may not only help  
11 improve mobility and function, they may support social engagement and reduce social isolation  
12 and loneliness. Given the rapid growth of technology use by older people, technology-based  
13 group exercise interventions offer opportunities for people living with dementia to participate in  
14 exercise to manage dementia symptoms, improve social connections, and enhance their quality  
15 of life[16].

16  
17  
18  
19  
20  
21  
22  
23  
24  
25  
26  
27  
28  
29  
30  
31  
32  
33 In this scoping review study, ‘technology-based exercise intervention’ will refer to any  
34 exercise intervention in which technology is essential to the activity. Exergames, also known as  
35 interactive exercise-based video games or virtual reality exercise games, have been used as an  
36 acceptable intervention to increase physical activity in older adults [17,18]. In addition to  
37 exergames and virtual reality exercise games, recent technological advances have created the  
38 potential for an online exercise intervention with synchronous monitoring through a secure  
39 videoconferencing platform (e.g., Zoom, WebEx) on a desktop or laptop computer or tablet  
40 [16,19]. Remotely delivered exercise interventions via video conferencing have been found to be  
41 feasible for improving physical activity in individuals with disabilities [16]. Group-based  
42 exercise interventions could increase physical activity and improve emotional well-being.  
43  
44  
45  
46  
47  
48  
49  
50  
51  
52  
53  
54  
55

1  
2  
3 Synchronous online group exercise could develop social connections via the Internet among  
4  
5 people with dementia, who are often isolated from society [16].  
6

7  
8 With technology-based interventions, people with dementia and their caregivers can  
9  
10 experience socialization without the need to go to a community center [16]. Several systematic  
11  
12 reviews or meta-analyses have analyzed the effects of exergames (e.g., Swinnen et al., 2020;  
13  
14 Zhao et al., 2020) or virtual reality (Kim, Pang, & Kim, 2019) in people with major cognitive  
15  
16 neurocognitive disorder, mild cognitive impairment, or dementia [20–22]. However, a  
17  
18 preliminary search of MEDLINE, the Cochrane Database of Systematic Reviews and JBI  
19  
20 Evidence Synthesis was conducted as of July 2021, and no current systematic/meta-analysis or  
21  
22 scoping review has been conducted on the topic of technology-based group interventions that  
23  
24 included virtual reality, exergame, or other Internet-based intervention (synchronous or  
25  
26 asynchronous) to support people with dementia. This gap is addressed in this comprehensive  
27  
28 review of the types of technology-based interventions across dementias and mild cognitive  
29  
30 impairment and their effects. The format of the scoping review is specifically appropriate to  
31  
32 mapping out the existing evidence on technology-based group interventions for people with  
33  
34 dementia [23].  
35  
36  
37  
38  
39

40 The main objective of the scoping review is to understand and summarize the extent of  
41  
42 evidence with respect to the existence of technology-based group exercise interventions for  
43  
44 people with dementia and the outcome measures studied reported in the literature.  
45  
46

### 47 **Review Questions**

- 48
- 49 1. What technology-based group exercise interventions exist for people with dementia?
  - 50 2. What outcomes and impacts of technology-based group exercise interventions for  
51  
52 people with dementia have been reported in the literature?  
53  
54



## METHODS

The proposed scoping review will be conducted in accordance with the JBI methodology for scoping reviews. [24]

### Inclusion Criteria

#### Participants

We will include studies that focus on people with all types of dementia and/or all types of cognitive impairment, including mild cognitive impairment, and people of all ages. We will consider studies that involved people living with conditions that are subtypes of dementia, such as Parkinson's disease dementia. Studies that do not focus on any types of dementia will be excluded.

#### Concept

This review will focus on technology-based group exercise interventions for people with dementia. We will include studies that involved at least one group of people with dementia, and or any form of cognitive impairment including mild cognitive impairment (MCI). A group is defined as any collection of two or more people, including participant and caregiver dyads. Any interventions that are individual in nature and are not delivered in a group format will be excluded. Technology-based exercise includes any form of exercise in which technology is integral to the execution of the activity, such as interventions through video-sharing or online platforms, exergaming, and virtual reality exercises. We will also consider exercise intervention to include any sort of physical activity. Any studies that focus solely on cognitive-based interventions will be excluded. Although MCI is considered to be distinct from dementia, due to the relative difficulty of studying people with higher levels of cognitive impairment, as well as the fact that MCI is often considered a precursor to dementia, studies that focus on technology-

1  
2  
3 based group exercise interventions for people with cognitive impairment will be included in this  
4  
5 review, as implications learned from MCI focused studies could be relevant for populations with  
6  
7 dementia[25].  
8  
9

## 10 Context

11  
12 We will include studies in which the intervention took place in homes, assisted living facilities,  
13  
14 memory care facilities, and research facilities. We will not include studies in which interventions  
15  
16 took place in a hospital facility.  
17  
18

## 19 Types of Studies

20  
21 This scoping review will consider both experimental and quasi-experimental study designs  
22  
23 including randomized controlled trials, nonrandomized controlled trials, before and after studies  
24  
25 and interrupted time-series studies. In addition, analytical observational studies including  
26  
27 prospective and retrospective cohort studies, case-control studies and analytical cross-sectional  
28  
29 studies will be considered for inclusion. This review will also consider descriptive observational  
30  
31 study designs including case series and descriptive cross-sectional studies. Qualitative studies  
32  
33 and systematic reviews that meet the inclusion criteria will also be considered. Text and opinion  
34  
35 papers will be considered for inclusion. Studies published in English will be included. Studies  
36  
37 will be included with no time limit on publication date.  
38  
39  
40  
41

## 42 Search Strategy

43  
44 The scoping review will follow the three step search strategy as recommended by the JBI  
45  
46 methodology [24].The search strategy is designed to locate both published and unpublished  
47  
48 studies. An initial limited search of MEDLINE and CINAHL Embase will be undertaken to  
49  
50 identify articles on the topic. This preliminary search will use these selected keywords:  
51  
52  
53 (Dementia or (Alzheimer disease)) AND ((web-based intervention) OR (exergaming) OR  
54  
55

1  
2  
3 (exergame) OR (virtual reality) OR (technology-based intervention) OR telehealth OR  
4  
5 telemedicine) AND (Exercise OR (physical activity)). The text words contained in the titles and  
6  
7 abstracts of relevant articles and the index terms used to describe the articles will be used to  
8  
9 develop a full search strategy for selected databases such as MEDLINE/PubMed, CINAHL, Web  
10  
11 of Science, Embase, Cochrane Library, and PsychInfo (Appendix I). The search strategy,  
12  
13 including all identified keywords and index terms, will be adapted for each included database. A  
14  
15 full search strategy for MEDLINE/PubMed is included in Appendix I. The reference lists of all  
16  
17 included sources of evidence will be screened for additional relevant studies. We have worked  
18  
19 and will continue to work with a medical librarian to continue to refine the search strategy in  
20  
21 order to ensure that relevant and key articles are found.  
22  
23  
24  
25

### 26 **Information Sources**

27  
28 The databases to be searched include MEDLINE/PubMed, CINAHL, Web of Science, Embase,  
29  
30 Cochrane Library, and PsychInfo. Sources of unpublished studies/gray literature to be searched  
31  
32 include Google, Web of Science, and Embase.  
33  
34

### 35 **Study/Source of Evidence Selection**

36  
37 Following the search, all identified citations will be collated and uploaded into Mendeley and  
38  
39 duplicates will be removed. Titles and abstracts will then be screened by three researchers for  
40  
41 assessment against the inclusion criteria. Potentially relevant sources will be retrieved in full and  
42  
43 their citation details imported into the JBI System for the Unified Management, Assessment and  
44  
45 Review of Information (JBI SUMARI; JBI, Adelaide, Australia). The full text of selected  
46  
47 citations will be assessed in detail against the inclusion criteria by two independent reviewers.  
48  
49 Reasons for exclusion of sources of evidence at the full text review that do not meet the inclusion  
50  
51 criteria will be recorded and reported in the scoping review. Any disagreements between the  
52  
53  
54  
55

1  
2  
3 reviewers at each stage of the selection process will be resolved through discussion with  
4  
5 additional reviewers. The results of the search and the study inclusion process will be reported in  
6  
7 full in the final scoping review and presented in a Preferred Reporting Items for Systematic  
8  
9 Reviews and Meta-analyses extension for scoping review (PRISMA-ScR) flow diagram[26].  
10  
11

## 12 **Data Extraction**

13  
14 Data will be extracted from papers included in the scoping review by four independent reviewers  
15  
16 using a data extraction tool developed by the reviewers. The extracted data will include specific  
17  
18 details about the author(s), year and country of publication, setting, population and sample size,  
19  
20 research design and methods, intervention type, outcome measures, and impact and results.  
21  
22

23  
24 A draft charting table is provided (see Appendix II). The data extraction tool will be pilot tested  
25  
26 by the two independent researchers by extracting data from three papers and comparing results.  
27  
28 The draft data extraction tool will be modified and revised as necessary during the process of  
29  
30 extracting data from each included evidence source. Modifications will be detailed in the scoping  
31  
32 review. Any disagreements between the reviewers will be resolved through discussion. If  
33  
34 appropriate, authors of papers will be contacted to request missing or additional data, where  
35  
36 required.  
37  
38

## 39 **Patient and Public Involvement**

40  
41 There are several family and patient partners who will join us for meetings in which we will  
42  
43 discuss the data that have been extracted from the articles. The family partners are people who  
44  
45 have a family member with dementia and may act as the primary caregiver to the person living  
46  
47 with dementia, whereas the patient partners are people living with dementia. Prior to discussing  
48  
49 extracted data in meetings, the patient and family partners may review extracted data and several  
50  
51 full-text articles; the number of full-text articles will be determined by each individual partner.  
52  
53  
54  
55

1  
2  
3 However, we anticipate that each person will review one to three articles. Each partner can  
4 choose to be a named co-author in the scoping review paper, or remain anonymous. (See  
5  
6 acknowledgements of this paper for the full names of our patient and family partners who have  
7  
8 chosen to be identified.) The patient and family partners were recruited from various memory  
9  
10 disorder clinics.  
11  
12

### 13 14 **Ethics and Dissemination**

15  
16 For this scoping review, data will be collected from publicly available articles. Thus, neither  
17  
18 informed consent nor research ethics approval is required. The findings will be disseminated to  
19  
20 health care practitioners and the public through a peer-reviewed publication and presentations at  
21  
22 conferences.  
23  
24

### 25 26 **Data Analysis and Presentation**

27  
28 The extracted data will be presented in a table to summarize the evidence. A narrative summary  
29  
30 will accompany the charted results and will describe the qualities of the literature on technology-  
31  
32 based group exercise interventions for people living with dementia. The categories that will be  
33  
34 used in the presentation of data include year of publication, author(s), country, setting,  
35  
36 population and sample size, research design and methods, intervention type, outcome measures,  
37  
38 and impact and results.  
39  
40

### 41 42 **Acknowledgements**

43  
44 The authors acknowledge and thank Senior Medical Librarian, Michelle Keba Knecht at Florida  
45  
46 Atlantic University Charles E. Schmidt College of Medicine for her assistance. We thank our  
47  
48 family and patient partners for their work and contribution to this scoping review. Our patient  
49  
50 partners are Betty Riley, Vincent Celeste, David Call; our family partners are: Nate Riley, Diane  
51  
52 Celeste, and Dierdre Lacativa.  
53  
54

## Contributors

LH and JY conceived the idea. All authors helped to refine the research question and develop the protocol and methods. HL drafted the manuscript with support from JY, PR and LH, who made meaningful contributions. LH edited the final manuscript. All authors approved the final manuscript.

**Funding** This research received no specific grant from any funding agency in the public, commercial or not-for-profit sectors.

**Competing interests** None declared.

**Patient consent for publication** Not required.

**Provenance and peer review** Not commissioned, externally peer reviewed.

**Open access** This is an open access article distributed in accordance with the Creative Commons Attribution Non Commercial (CC BY NC 4.0) license, which permits others to distribute, remix, adapt, build on this work noncommercially, and license their derivative works on different terms, provided the original work is properly cited, appropriate credit is given, any changes made indicated, and the use is noncommercial. See <http://creativecommons.org/licenses/by-nc/4.0/>.

## References

- 1 Emmady PD, Tadi P. Dementia. *StatPearls* Published online First: 10 April 2021. <https://www.ncbi.nlm.nih.gov/books/NBK557444/> (accessed 18 Jul 2021).
- 2 Tible OP, Riese F, Savaskan E, *et al*. Best practice in the management of behavioural and psychological symptoms of dementia. *Ther Adv Neurol Disord* 2017;**10**:297–309. doi:10.1177/1756285617712979
- 3 Lam F, Huang M-Z, Liao L-R, *et al*. Physical exercise improves strength, balance, mobility, and endurance in people with cognitive impairment and dementia: a systematic

- 1  
2  
3 review. *J Physiother* 2018;**64**:4–15. doi:10.1016/J.JPHYS.2017.12.001  
4  
5  
6 4 Dementia. <https://www.who.int/news-room/fact-sheets/detail/dementia> (accessed 18 Jul  
7  
8 2021).  
9  
10 5 Ohno Y, Kunisawa N, Shimizu S. Antipsychotic Treatment of Behavioral and  
11  
12 Psychological Symptoms of Dementia (BPSD): Management of Extrapramidal Side  
13  
14 Effects. *Front Pharmacol* 2019;**10**. doi:10.3389/FPHAR.2019.01045  
15  
16  
17 6 Macfarlane S, O'Connor D. Managing behavioural and psychological symptoms in  
18  
19 dementia. *Aust Prescr* 2016;**39**:123–5. doi:10.18773/AUSTPRESCR.2016.052  
20  
21  
22 7 Hobson N, Dupuis S, Giangregorio L, *et al*. Perceived Facilitators and Barriers to Exercise  
23  
24 Among Older Adults With Mild Cognitive Impairment and Early Dementia. *J Aging Phys*  
25  
26 *Act* 2020;**28**:208–18. doi:10.1123/JAPA.2019-0010  
27  
28  
29 8 Morris J, Vidoni E, Johnson D, *et al*. Aerobic exercise for Alzheimer's disease: A  
30  
31 randomized controlled pilot trial. *PLoS One* 2017;**12**.  
32  
33 doi:10.1371/JOURNAL.PONE.0170547  
34  
35  
36 9 McCaffrey R, Park J, Newman D, *et al*. The effect of chair yoga in older adults with  
37  
38 moderate and severe Alzheimer's disease. *Res Gerontol Nurs* 2014;**7**:171–7.  
39  
40 doi:10.3928/19404921-20140218-01  
41  
42  
43 10 Hsieh C-C, Lin P-S, Hsu W-C, *et al*. The Effectiveness of a Virtual Reality-Based Tai Chi  
44  
45 Exercise on Cognitive and Physical Function in Older Adults with Cognitive Impairment.  
46  
47 *Dement Geriatr Cogn Disord* 2018;**46**:358–70. doi:10.1159/000494659  
48  
49  
50 11 Lee HS, Park SW, Park YJ. Effects of Physical Activity Programs on the Improvement of  
51  
52 Dementia Symptom: A Meta-Analysis. *Biomed Res Int* 2016;**2016**.  
53  
54 doi:10.1155/2016/2920146  
55

- 1  
2  
3 12 Boehm J, Franklin R, Newitt R, *et al.* Barriers and motivators to exercise for older adults:  
4 a focus on those living in rural and remote areas of Australia. *Aust J Rural Health*  
5  
6 2013;**21**:141–9. doi:10.1111/AJR.12032  
7  
8  
9  
10 13 Logsdon RG, McCurry SM, Pike KC, *et al.* Making Physical Activity Accessible to Older  
11 Adults With Memory Loss: A Feasibility Study. *Gerontologist* 2009;**49**:S94–9.  
12  
13 doi:10.1093/GERONT/GNP082  
14  
15  
16  
17 14 Balouch S, Rifaat E, Chen HL, *et al.* Social networks and loneliness in people with  
18 Alzheimer’s dementia. *Int J Geriatr Psychiatry* 2019;**34**:666–73. doi:10.1002/GPS.5065  
19  
20  
21  
22 15 Courtin E, Knapp M. Social isolation, loneliness and health in old age: a scoping review.  
23  
24 *Health Soc Care Community* 2017;**25**:799–812. doi:10.1111/HSC.12311  
25  
26  
27 16 Ptomey LT, Willis EA, Greene JL, *et al.* The Feasibility of Group Video Conferencing for  
28 Promotion of Physical Activity in Adolescents With Intellectual and Developmental  
29 Disabilities. *Am J Intellect Dev Disabil* 2017;**122**:525–38. doi:10.1352/1944-7558-  
30 122.6.525  
31  
32  
33  
34  
35 17 Valenzuela T, Okubo Y, Woodbury A, *et al.* Adherence to Technology-Based Exercise  
36 Programs in Older Adults: A Systematic Review. *J Geriatr Phys Ther* 2018;**41**:49–61.  
37  
38 doi:10.1519/JPT.0000000000000095  
39  
40  
41  
42 18 Nawaz A, Skjæret N, Helbostad J, *et al.* Usability and acceptability of balance exergames  
43 in older adults: A scoping review. *Health Informatics J* 2016;**22**:911–31.  
44  
45  
46  
47  
48  
49 19 Galiano-Castillo N, Cantarero-Villanueva I, Fernández-Lao C, *et al.* Telehealth system: A  
50 randomized controlled trial evaluating the impact of an internet-based exercise  
51 intervention on quality of life, pain, muscle strength, and fatigue in breast cancer  
52  
53  
54  
55



- 1  
2  
3 survivors. *Cancer* 2016;**122**:3166–74. doi:10.1002/CNCR.30172  
4
- 5 20 Swinnen N, Vandenbulcke M, Vancampfort D. Exergames in people with major  
6 neurocognitive disorder: a systematic review. *Disabil Rehabil Assist Technol* 2020;:1–14.  
7  
8 doi:10.1080/17483107.2020.1785566  
9
- 10  
11  
12 21 Zhao Y, Feng H, Wu X, *et al*. Effectiveness of Exergaming in Improving Cognitive and  
13 Physical Function in People With Mild Cognitive Impairment or Dementia: Systematic  
14 Review. *JMIR serious games* 2020;**8**:e16841. doi:10.2196/16841  
15  
16  
17  
18  
19 22 Kim O, Pang Y, Kim J-H. The effectiveness of virtual reality for people with mild  
20 cognitive impairment or dementia: a meta-analysis. *BMC Psychiatry* 2019;**19**.  
21  
22 doi:10.1186/S12888-019-2180-X  
23  
24  
25
- 26 23 Peters M, Godfrey C, McInerney P, *et al*. Chapter 11: Scoping Reviews. *JBI Man Evid*  
27 *Synth* Published Online First: 2020. doi:10.46658/JBIMES-20-12  
28  
29
- 30  
31 24 Peters MDJ, Godfrey CM, Khalil H, *et al*. Guidance for conducting systematic scoping  
32 reviews. *Int J Evid Based Healthc* 2015;**13**:141–6. doi:10.1097/XEB.0000000000000050  
33  
34
- 35 25 Plassman BL, Langa KM, Fisher GG, *et al*. Prevalence of Cognitive Impairment without  
36 Dementia in the United States. *Ann Intern Med* 2008;**148**:427./pmc/articles/PMC2670458/  
37 (accessed 19 Jul 2021).  
38  
39  
40  
41
- 42 26 Page MJ, McKenzie JE, Bossuyt PM, *et al*. The PRISMA 2020 statement: An updated  
43 guideline for reporting systematic reviews. *BMJ* 2021;**372**. doi:10.1136/BMJ.N71  
44  
45  
46  
47  
48  
49  
50  
51  
52  
53  
54  
55  
56  
57  
58  
59  
60

1  
2  
3  
4  
5  
6  
7  
8  
9  
10  
11  
12  
13  
14  
15  
16  
17  
18  
19  
20  
21  
22  
23  
24  
25  
26  
27  
28  
29  
30  
31  
32  
33  
34  
35  
36  
37  
38  
39  
40  
41  
42  
43  
44  
45  
46  
47  
48  
49  
50  
51  
52  
53  
54  
55  
56  
57  
58  
59  
60

For peer review only

## Appendix I: Search Strategy

We have worked with and will continue to work with a medical librarian at the university to alter the search strategy to ensure that relevant articles are found.

We will follow the three-step approach methodology delineated by the Joanna Briggs Institute Scoping Review Guidelines.

Step 1: The preliminary search included two online databases relevant to the topic:

PubMed/MEDLINE and Embase.

Example Preliminary Embase Search:

| #  | Searches                                                                                                                                     | Results  |
|----|----------------------------------------------------------------------------------------------------------------------------------------------|----------|
| S1 | Dementia or (Alzheimer disease)                                                                                                              | 193,282  |
| S2 | (web-based intervention) OR (exergaming) OR (exergame) OR (virtual reality) OR (technology-based intervention) OR telehealth OR telemedicine | 46,382   |
| S3 | Exercise OR (physical activity)                                                                                                              | 509, 456 |
| S4 | S1 AND S2 AND S3                                                                                                                             | 38       |

The initial search will be followed by an analysis of words contained in the titles and abstracts of retrieved papers, as well as index terms used to describe the articles.

Step 2: Using identified keywords and index terms, a second search will be undertaken across all selected databases: MEDLINE/PubMed, CINAHL, Web of Science, Embase, Cochrane Library, and PsychInfo.

Example PubMed Search:

| #  | Search: 7/9/21                                                                   | Results         |
|----|----------------------------------------------------------------------------------|-----------------|
| S1 | (Dementia) OR (Alzheimer) OR (Cognitive impairment) OR (Neurocognitive disorder) | 424,743 results |

|    |                                                                                                                                                                                                                                 |                 |
|----|---------------------------------------------------------------------------------------------------------------------------------------------------------------------------------------------------------------------------------|-----------------|
| S2 | (Online-based intervention) OR (web-based intervention) OR (internet-based intervention) OR (exergaming or exergame) OR (virtual reality) OR (technology-based intervention) OR telehealth OR (remote delivery) OR telemedicine | 79,124 results  |
| S3 | Exercise OR (physical activity) OR (exercise intervention) OR (exercise therapy)                                                                                                                                                | 633,929 results |
| S4 | S1 AND S2 AND S3                                                                                                                                                                                                                | 241             |

2a. Search terms and combinations in step 2:

| Dementia terms          | Technology terms            | Exercise terms        |
|-------------------------|-----------------------------|-----------------------|
| Dementia                | Online-based intervention   | Exercise              |
| Alzheimer               | Web-based intervention      | Physical activity     |
| Cognitive impairment    | Internet-based intervention | Exercise intervention |
| Neurocognitive disorder | Exergaming                  | Exercise therapy      |
|                         | Exergame                    |                       |
|                         | Virtual reality             |                       |
|                         | Technology-based            |                       |
|                         | Telehealth                  |                       |
|                         | Telemedicine                |                       |
|                         | Remote delivery             |                       |

1  
2  
3 2b. Google, Web of Science, and Embase will be used to search grey literature. The Google,  
4 Web of Science, and Embase searches will be performed using the following terms: (dementia  
5 OR Alzheimer OR cognitive impairment OR neurocognitive disorder) AND (online OR web OR  
6 internet OR exergame OR virtual reality OR technology-based OR technology-based OR  
7 telehealth OR telemedicine OR remote delivery) AND (exercise OR physical activity OR  
8 exercise intervention OR exercise therapy)  
9

10  
11  
12 Step 3: The reference lists of all included studies and articles will be searched for additional  
13 relevant studies. Google Scholar will be used to find published articles and related studies.  
14  
15  
16  
17  
18  
19  
20  
21  
22  
23  
24  
25  
26  
27  
28  
29  
30  
31  
32  
33  
34  
35  
36  
37  
38  
39  
40  
41  
42  
43  
44  
45  
46  
47  
48  
49  
50  
51  
52  
53  
54  
55  
56  
57  
58  
59  
60

**Appendix II: Data Extraction Instrument**

| Author, Year, Country | Aim | Population, Sample Size, setting | Research Design and Methods | Intervention Type | Outcome Measures | Impact and results |
|-----------------------|-----|----------------------------------|-----------------------------|-------------------|------------------|--------------------|
|                       |     |                                  |                             |                   |                  |                    |
|                       |     |                                  |                             |                   |                  |                    |

For peer review only

## Preferred Reporting Items for Systematic reviews and Meta-Analyses extension for Scoping Reviews (PRISMA-ScR) Checklist

| SECTION                           | ITEM | PRISMA-ScR CHECKLIST ITEM                                                                                                                                                                                                                                                 | REPORTED ON PAGE #                                                                                                                                        |
|-----------------------------------|------|---------------------------------------------------------------------------------------------------------------------------------------------------------------------------------------------------------------------------------------------------------------------------|-----------------------------------------------------------------------------------------------------------------------------------------------------------|
| <b>TITLE</b>                      |      |                                                                                                                                                                                                                                                                           |                                                                                                                                                           |
| Title                             | 1    | Identify the report as a scoping review.                                                                                                                                                                                                                                  | P.1 title                                                                                                                                                 |
| <b>ABSTRACT</b>                   |      |                                                                                                                                                                                                                                                                           |                                                                                                                                                           |
| Structured summary                | 2    | Provide a structured summary that includes (as applicable): background, objectives, eligibility criteria, sources of evidence, charting methods, results, and conclusions that relate to the review questions and objectives.                                             | P.2 Abstract and article summary                                                                                                                          |
| <b>INTRODUCTION</b>               |      |                                                                                                                                                                                                                                                                           |                                                                                                                                                           |
| Rationale                         | 3    | Describe the rationale for the review in the context of what is already known. Explain why the review questions/objectives lend themselves to a scoping review approach.                                                                                                  | P.3-5 Introduction                                                                                                                                        |
| Objectives                        | 4    | Provide an explicit statement of the questions and objectives being addressed with reference to their key elements (e.g., population or participants, concepts, and context) or other relevant key elements used to conceptualize the review questions and/or objectives. | P. 5-7 Study objective, population, concepts, and context, review question                                                                                |
| <b>METHODS</b>                    |      |                                                                                                                                                                                                                                                                           |                                                                                                                                                           |
| Protocol and registration         | 5    | Indicate whether a review protocol exists; state if and where it can be accessed (e.g., a Web address); and if available, provide registration information, including the registration number.                                                                            | This article is the protocol for the scoping review                                                                                                       |
| Eligibility criteria              | 6    | Specify characteristics of the sources of evidence used as eligibility criteria (e.g., years considered, language, and publication status), and provide a rationale.                                                                                                      | P. 7 inclusion criteria                                                                                                                                   |
| Information sources*              | 7    | Describe all information sources in the search (e.g., databases with dates of coverage and contact with authors to identify additional sources), as well as the date the most recent search was executed.                                                                 | P. 8-9 Type of studies, information sources, search strategy<br>Supplementary file 1, a sample of literature search with Boolean operators and truncation |
| Search                            | 8    | Present the full electronic search strategy for at least 1 database, including any limits used, such that it could be repeated.                                                                                                                                           | Supplementary file 1                                                                                                                                      |
| Selection of sources of evidence† | 9    | State the process for selecting sources of evidence (i.e., screening and eligibility) included in the scoping review.                                                                                                                                                     | P. 9 Study selection                                                                                                                                      |
| Data charting process‡            | 10   | Describe the methods of charting data from the included sources of evidence (e.g., calibrated forms or forms that have been tested by the team before their use, and whether data charting was done independently or in duplicate) and any                                | P.10 Data extraction, supplementary file 2 – data extraction instrument                                                                                   |

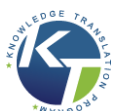

|                                                       |    |                                                                                                                                                                                                       |                                                                                |
|-------------------------------------------------------|----|-------------------------------------------------------------------------------------------------------------------------------------------------------------------------------------------------------|--------------------------------------------------------------------------------|
|                                                       |    | processes for obtaining and confirming data from investigators.                                                                                                                                       |                                                                                |
| Data items                                            | 11 | List and define all variables for which data were sought and any assumptions and simplifications made.                                                                                                | P. 11, Data analysis and presentation                                          |
| Critical appraisal of individual sources of evidence§ | 12 | If done, provide a rationale for conducting a critical appraisal of included sources of evidence; describe the methods used and how this information was used in any data synthesis (if appropriate). | NA. Quality appraisal will not be performed on studies in this scoping review. |
| Synthesis of results                                  | 13 | Describe the methods of handling and summarizing the data that were charted.                                                                                                                          | To be conducted in the scoping review                                          |
| <b>RESULTS</b>                                        |    |                                                                                                                                                                                                       |                                                                                |
| Selection of sources of evidence                      | 14 | Give numbers of sources of evidence screened, assessed for eligibility, and included in the review, with reasons for exclusions at each stage, ideally using a flow diagram.                          | To be conducted in the scoping review                                          |
| Characteristics of sources of evidence                | 15 | For each source of evidence, present characteristics for which data were charted and provide the citations.                                                                                           | To be conducted in the scoping review                                          |
| Critical appraisal within sources of evidence         | 16 | If done, present data on critical appraisal of included sources of evidence (see item 12).                                                                                                            | N/A                                                                            |
| Results of individual sources of evidence             | 17 | For each included source of evidence, present the relevant data that were charted that relate to the review questions and objectives.                                                                 | To be conducted in the scoping review                                          |
| Synthesis of results                                  | 18 | Summarize and/or present the charting results as they relate to the review questions and objectives.                                                                                                  | To be conducted in the scoping review                                          |
| <b>DISCUSSION</b>                                     |    |                                                                                                                                                                                                       |                                                                                |
| Summary of evidence                                   | 19 | Summarize the main results (including an overview of concepts, themes, and types of evidence available), link to the review questions and objectives, and consider the relevance to key groups.       | To be conducted in the scoping review                                          |
| Limitations                                           | 20 | Discuss the limitations of the scoping review process.                                                                                                                                                | P.3                                                                            |
| Conclusions                                           | 21 | Provide a general interpretation of the results with respect to the review questions and objectives, as well as potential implications and/or next steps.                                             | To be conducted in the scoping review                                          |
| <b>FUNDING</b>                                        |    |                                                                                                                                                                                                       |                                                                                |
| Funding                                               | 22 | Describe sources of funding for the included sources of evidence, as well as sources of funding for the scoping review. Describe the role of the funders of the scoping review.                       | P.12                                                                           |

JBI = Joanna Briggs Institute; PRISMA-ScR = Preferred Reporting Items for Systematic reviews and Meta-Analyses extension for Scoping Reviews.

\* Where *sources of evidence* (see second footnote) are compiled from, such as bibliographic databases, social media platforms, and Web sites.

† A more inclusive/heterogeneous term used to account for the different types of evidence or data sources (e.g., quantitative and/or qualitative research, expert opinion, and policy documents) that may be eligible in a scoping review as opposed to only studies. This is not to be confused with *information sources* (see first footnote).

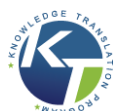



1  
2  
3 ‡ The frameworks by Arksey and O'Malley (6) and Levac and colleagues (7) and the JBI guidance (4, 5) refer to the  
4 process of data extraction in a scoping review as data charting.  
5 § The process of systematically examining research evidence to assess its validity, results, and relevance before  
6 using it to inform a decision. This term is used for items 12 and 19 instead of "risk of bias" (which is more applicable  
7 to systematic reviews of interventions) to include and acknowledge the various sources of evidence that may be used  
8 in a scoping review (e.g., quantitative and/or qualitative research, expert opinion, and policy document).  
9

10  
11 *From:* Tricco AC, Lillie E, Zarin W, O'Brien KK, Colquhoun H, Levac D, et al. PRISMA Extension for Scoping Reviews (PRISMA-  
12 ScR): Checklist and Explanation. *Ann Intern Med.* ;169:467–473. doi: 10.7326/M18-0850  
13  
14  
15  
16  
17  
18  
19  
20  
21  
22  
23  
24  
25  
26  
27  
28  
29  
30  
31  
32  
33  
34  
35  
36  
37  
38  
39  
40  
41  
42  
43  
44  
45  
46  
47  
48  
49  
50  
51  
52  
53  
54  
55  
56  
57

For peer review only

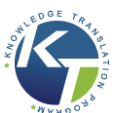

# BMJ Open

## Technology-Based Group Exercise Interventions for People Living With Dementia or Mild Cognitive Impairment: A Scoping Review Protocol

|                                 |                                                                                                                                                                                                                                                                                                                                                                                                                |
|---------------------------------|----------------------------------------------------------------------------------------------------------------------------------------------------------------------------------------------------------------------------------------------------------------------------------------------------------------------------------------------------------------------------------------------------------------|
| Journal:                        | <i>BMJ Open</i>                                                                                                                                                                                                                                                                                                                                                                                                |
| Manuscript ID                   | bmjopen-2021-055990.R1                                                                                                                                                                                                                                                                                                                                                                                         |
| Article Type:                   | Protocol                                                                                                                                                                                                                                                                                                                                                                                                       |
| Date Submitted by the Author:   | 13-Dec-2021                                                                                                                                                                                                                                                                                                                                                                                                    |
| Complete List of Authors:       | Hung, Lillian; University of British Columbia; Vancouver General Hospital<br>Levine, Hannah; Florida Atlantic University Charles E Schmidt College of<br>Medicine, Marcus Institute of Integrative Health at FAU Medicine<br>Randhawa, Paavan; Langara College<br>Park, Juyoung; Florida Atlantic University, College of Social Work and<br>Criminal Justice, Phyllis and Harvey Sandler School of Social Work |
| <b>Primary Subject Heading</b>: | Geriatric medicine                                                                                                                                                                                                                                                                                                                                                                                             |
| Secondary Subject Heading:      | Geriatric medicine, Neurology                                                                                                                                                                                                                                                                                                                                                                                  |
| Keywords:                       | Dementia < NEUROLOGY, Telemedicine < BIOTECHNOLOGY &<br>BIOINFORMATICS, World Wide Web technology < BIOTECHNOLOGY &<br>BIOINFORMATICS, GERIATRIC MEDICINE                                                                                                                                                                                                                                                      |
|                                 |                                                                                                                                                                                                                                                                                                                                                                                                                |

SCHOLARONE™  
Manuscripts

1  
2  
3 **Title: Technology-Based Group Exercise Interventions for People Living With Dementia or Mild**  
4 **Cognitive Impairment: A Scoping Review Protocol**  
5  
6  
7

8 Lillian Hung,<sup>1</sup> R.N., Ph.D.  
9

10 Hannah Levine,<sup>2</sup> B.S.  
11

12 Paavan Randhawa<sup>3</sup>  
13

14 Juyoung Park<sup>4</sup> Ph.D.  
15  
16

17 <sup>1</sup>School of Nursing, University of British Columbia, Vancouver, British Columbia, Canada

18 <sup>2</sup>Charles E. Schmidt College of Medicine, Marcus Institute of Integrative Health at FAU Medicine, Florida  
19 Atlantic University, Boca Raton, Florida, USA

20 <sup>3</sup>Faculty of General Sciences, Langara College, Vancouver, British Columbia, Canada

21 <sup>4</sup>Phyllis & Harvey Sandler School of Social Work, College of Social Work & Criminal Justice, Florida  
22 Atlantic University, Boca Raton, Florida, USA  
23  
24  
25  
26  
27  
28  
29  
30  
31

32 Corresponding author:  
33

34 Hannah Levine  
35

36 Charles E. Schmidt College of Medicine, Florida Atlantic University, Boca Raton, Florida, USA, Email:  
37 hlevine2016@health.fau.edu  
38  
39  
40

41 Declarations of interests: none.  
42  
43  
44  
45  
46  
47  
48  
49  
50  
51  
52  
53  
54  
55  
56  
57  
58  
59  
60

## ABSTRACT

**Introduction** More than 50 million people worldwide are living with dementia in 2020, and this number is expected to double every 20 years. Physical exercise is a growing field in nonpharmacological interventions for dementia care. Due to public health measures during the COVID-19 pandemic, more people have considered adapting to technology-based exercise via digital devices. This scoping review will explore evidence relating to the use of technology-based group exercise by people with dementia or mild cognitive impairment.

**Methods and analysis** This review will follow the Joanna Briggs Institute scoping review methodology to review literature published between June and December 2021. This review is designed to identify existing types of technology-based group exercise interventions for people with dementia. The review will provide a synthesis of current evidence on the outcome and impacts of technology-based group exercise. The context of this review will include homes, assisted living facilities, and memory care services but exclude hospitals. The review will include a three-step search strategy: (a) identify keywords from MEDLINE and Embase, (b) search using the identified keywords in databases (MEDLINE/PubMed, CINAHL, Web of Science, Embase, Cochrane Library, and PsychInfo, and Google), and (c) review references from included studies to identify additional studies. Only studies in English will be included. Four researchers will independently assess titles and abstracts and then review the full text of the selected articles, applying the inclusion criteria. The extracted data will be presented in tables and summarized narratively.

**Ethics and dissemination** Scoping review data will be collected from publicly available articles; research ethics approval is not required. The findings will be disseminated to health care practitioners and the public through a peer-reviewed publication and conference presentations.

**KEYWORDS:** Dementia, telemedicine, world wide web technology, geriatric medicine.

## STRENGTHS AND LIMITATIONS OF THIS STUDY

- This scoping review will follow the Joanna Briggs Institute Scoping Review Manual to ensure scientific rigour.
- Patients and family partners will be involved in the scoping review study.
- The review will be limited to literature published in English.
- Because the focus of this review is on technology-based group exercise for people with dementia or mild cognitive impairment living in the community, exercise programs provided by acute care services will not be captured.

## INTRODUCTION

Dementia is a neurodegenerative condition characterized by progressive deterioration of cognitive function, often affecting memory, thinking, judgment, personality, and visuospatial skills, among many other possible deficits[1]. In addition to cognitive impairment, due to its progressive degenerative nature, dementia leads to physical decline in balance, gait, and movement coordination, behavioral and psychological symptoms of dementia (BPSD), and social disability[2,3]. Dementia can be categorized based on etiology. Alzheimer's disease (AD) is the most common type of dementia, followed by other types, such as vascular dementia, Lewy body dementia, frontotemporal dementia, and Parkinson's disease. Dementia is a widespread health issue, affecting more than 50 million people globally, with more than 10 million new cases every year[4,5]. Mild cognitive impairment (MCI) is noticeable decline in cognitive function that is not severe enough to require help with daily activities[6,7]. Although considered to be distinct from dementia, MCI is often a precursor to dementia[8]. It has been estimated that 10%-15% of people with MCI progress to AD[9]. Research on MCI can provide knowledge for preventing progression of MCI into dementia[10].

Although the number of people with dementia is increasing worldwide, no curative treatment is currently available and effective palliative treatments are lacking. Antipsychotic medications used to manage BPSD in people with dementia, in particular older adults, can cause adverse events such as oversedation, psychomotor impairment, Parkinsonian symptoms, stroke, or falls, all of which can contribute to admission to the emergency department or long-term care facilities and increased health care costs[11,12]. Evidence-based, safe, and effective nonpharmacologic treatments are needed to relieve dementia symptoms and/or delay progression of the severity of the disease. Group exercise programs, such as chair yoga and tai chi, have shown positive effects in managing dementia symptoms[13–16].

Meta-analyses have shown overall benefits of various types of physical exercise on physical function and BPSD in people with dementia[17–19]. However, people with dementia face challenges to participate in exercise groups due to restricted range of motion, declined cognition and balance, and risk of falls[2,14,15]. Major barriers to physical exercise in this population could include lack of accessible opportunities, transportation to community sites where exercise classes are offered, and limited support from caregivers[13,20,21]. People with dementia are more likely to experience social isolation and loneliness, which have been linked to increased depression, cardiovascular risk, and overall detrimental effects to quality of life[22,23]. Group exercise programs may not only help to improve mobility and function; they may support social engagement and reduce social isolation and loneliness. Given the rapid growth of technology use by older people, technology-based group exercise interventions offer opportunities for people with dementia to participate in exercise to manage dementia symptoms, improve social connections, and enhance their quality of life[24].

In this scoping review study, *technology-based exercise intervention* will refer to any exercise intervention in which technology is essential to the activity. Exergames, also known as interactive exercise-based video games or virtual reality exercise games, have been used as an acceptable intervention to increase physical activity in older adults[25,26]. In addition to exergames and virtual reality exercise games, recent technological advances have created the potential for an online exercise intervention with synchronous monitoring through a secure videoconferencing platform (e.g., Zoom,

1  
2  
3 WebEx) on a computer or tablet [24,27]. Remotely delivered exercise interventions via video  
4 conferencing have been found to be feasible for improving physical activity in persons with  
5 disabilities[24]. Group-based exercise interventions could increase physical activity and improve  
6 emotional well-being. Synchronous online group exercise could develop social connections via the  
7 Internet among people with dementia, who are often isolated from society[24].  
8  
9

10 With technology-based interventions, people with dementia and their caregivers can experience  
11 socialization without the need to go to a community center[24]. Several systematic reviews or meta-  
12 analyses have analyzed the effects of exergames[24] or virtual reality [26] in people with major cognitive  
13 neurocognitive disorder, mild cognitive impairment, or dementia[28–30]. However, a preliminary search  
14 of MEDLINE, the Cochrane Database of Systematic Reviews, and JBI Evidence Synthesis was conducted  
15 as of July 2021, and no current systematic review, meta-analysis or scoping review has been conducted  
16 on the topic of technology-based group interventions that included virtual reality, exergame, or other  
17 Internet-based intervention (synchronous or asynchronous) to support people with dementia. This gap  
18 will be addressed in this comprehensive review of the types of technology-based interventions across  
19 dementias and MCI and their effects. The format of the scoping review is specifically appropriate to  
20 mapping out the existing evidence and identifying gaps in knowledge on the topic of technology-based  
21 group interventions for people with dementia or MCI[31].  
22  
23  
24

25 The main objective of the scoping review will be to understand and summarize the extent of evidence  
26 with respect to the existence of technology-based group exercise interventions for people with  
27 dementia or MCI and the outcome measures studied and reported in the literature.  
28

### 29 **Review Questions**

- 30  
31 1. What technology-based group exercise interventions exist for people with dementia or MCI?  
32  
33 2. What outcomes and impacts of technology-based group exercise interventions for people with  
34 dementia or MCI have been reported in the literature?  
35

### 36 **METHODS**

37  
38 The proposed scoping review will be conducted in accordance with the JBI methodology for  
39 scoping reviews[32].  
40

### 41 **Inclusion Criteria**

#### 42 ***Participants***

43  
44 We will include studies that focus on people with all types of dementia (e.g., AD, vascular  
45 dementia, Lewy body dementia, Parkinson's disease dementia, frontotemporal dementia) or MCI in  
46 people of all ages.  
47  
48

#### 49 ***Concept***

50  
51 This review will focus on technology-based group exercise interventions for people with  
52 dementia. We will include studies that involved at least one group of people with dementia or MCI. A  
53 *group* is defined as any collection of two or more people, including participant-caregiver dyads.  
54

1  
2  
3 *Technology-based exercise* includes any form of exercise in which technology is integral to the execution  
4 of the activity, such as interventions through video-sharing or online platforms, exergaming, and virtual  
5 reality exercises. We will consider *exercise intervention* to include any sort of physical activity. Any  
6 studies that focus solely on cognitive-based interventions will be excluded. Although MCI is considered  
7 to be distinct from dementia, due to the relative difficulty of studying people with higher levels of  
8 cognitive impairment, as well as the fact that MCI is often considered a precursor to dementia, studies  
9 that focus on technology-based group exercise interventions for people with MCI will be included in this  
10 review, as implications learned from MCI-focused studies could be relevant for populations with  
11 dementia[8].  
12  
13

### 14 **Context**

15  
16 We will include studies in which the intervention took place in homes, assisted living facilities, or  
17 memory care facilities. We will not include studies in which interventions took place in a hospital or  
18 research facility.  
19  
20

### 21 **Types of Studies**

22  
23 This scoping review will consider both experimental and quasi-experimental study designs,  
24 including randomized controlled trials, nonrandomized controlled trials, before-and-after studies and  
25 interrupted time-series studies. In addition, analytical observational studies, including prospective and  
26 retrospective cohort studies, case-control studies, and analytical cross-sectional studies will be  
27 considered for inclusion. This review will also consider descriptive observational study designs, including  
28 case series and descriptive cross-sectional studies. Qualitative studies and systematic reviews that meet  
29 the inclusion criteria will be considered. Text and opinion papers will be considered. Protocols will not  
30 be included. Only studies published in English will be included. There will be no limitation based on  
31 publication date.  
32  
33

### 34 **Search Strategy**

35  
36 The scoping review will follow the three-step search strategy recommended by the JBI  
37 methodology[32]. The search strategy is designed to locate both published and unpublished studies. An  
38 initial limited search of MEDLINE and CINAHL Embase will be undertaken to identify articles on the topic.  
39 This preliminary search will use these selected keywords: (Dementia or (Alzheimer disease)) AND ((web-  
40 based intervention) OR (exergaming) OR (exergame) OR (virtual reality) OR (technology-based  
41 intervention) OR telehealth OR telemedicine) AND (Exercise OR (physical activity)). The text words  
42 contained in the titles and abstracts of relevant articles and the index terms used to describe the articles  
43 will be used to develop a full search strategy for selected databases such as MEDLINE/PubMed, CINAHL,  
44 Web of Science, Embase, Cochrane Library, and PsychInfo (Appendix I). The search strategy, including all  
45 identified keywords and index terms, will be adapted for each included database. A full search strategy  
46 for MEDLINE/PubMed is included in Appendix I. The reference lists of all included sources of evidence  
47 will be screened for additional relevant studies. We have worked and will continue to work with a  
48 medical librarian to refine the search strategy in order to ensure that relevant and key articles are  
49 found.  
50  
51  
52  
53  
54

## Information Sources

The databases to be searched will be MEDLINE/PubMed, CINAHL, Web of Science, Embase, Cochrane Library, and PsychInfo. Sources of unpublished studies/gray literature to be searched will be Google, Web of Science, and Embase.

## Study/Source of Evidence Selection

Following the search, all identified citations will be collated and uploaded into Mendeley and duplicates will be removed. Titles and abstracts will then be screened by four researchers for assessment against the inclusion criteria. Potentially relevant sources will be retrieved in full and their citation details imported into the JBI System for the Unified Management, Assessment and Review of Information (JBI SUMARI; JBI, Adelaide, Australia). The full text of selected citations will be assessed in detail against the inclusion criteria by two independent reviewers. Reasons for exclusion of sources of evidence at the full text review that do not meet the inclusion criteria will be recorded and reported in the scoping review. Any disagreements between the reviewers at each stage of the selection process will be resolved through discussion with additional reviewers. The results of the search and the study inclusion process will be reported in full in the final scoping review and presented in a Preferred Reporting Items for Systematic Reviews and Meta-Analyses extension for scoping review (PRISMA-ScR) flow diagram[33].

## Data Extraction

Data will be extracted from papers included in the scoping review by four independent reviewers using a data extraction tool developed by the reviewers. The extracted data will include specific details about the author(s), year and country of publication, setting, population and sample size, research design and methods, intervention type, outcome measures, and impact and results.

A draft charting table is provided (Appendix II). The data extraction tool will be pilot tested by the two independent researchers by extracting data from three papers and comparing results. The draft data extraction tool will be modified and revised as necessary during the process of extracting data from each included evidence source. Modifications will be detailed in the scoping review. Any disagreements between the reviewers will be resolved through discussion. If appropriate, authors of papers will be contacted to request missing or additional data, where required.

## Patient and Public Involvement

Several family and patient partners will join us for meetings in which we will discuss the data that have been extracted from the articles. The *family partners* are people who have a family member with dementia and may act as the primary caregiver to the person with dementia, whereas the *patient partners* are people with dementia. Prior to discussing extracted data in meetings, the patient and family partners may review extracted data and several full-text articles; the number of full-text articles will be determined by each individual partner. We anticipate that each person will review one to three articles. Each partner can choose to be a named co-author in the scoping review paper or remain anonymous. (See acknowledgements of this paper for the full names of patient and family partners who



1  
2  
3 have chosen to be identified.) The patient and family partners were recruited from various memory  
4 disorder clinics.  
5

### 6 **Ethics and Dissemination**

7  
8 For this scoping review, data will be collected from publicly available articles. Thus, neither  
9 informed consent nor research ethics approval is required. The findings will be disseminated to health  
10 care practitioners and the public through a peer-reviewed publication and presentations at conferences.  
11

### 12 **Data Analysis and Presentation**

13  
14 The extracted data will be presented in a table to summarize the evidence. A narrative summary  
15 will accompany the charted results and will describe the qualities of the literature on technology-based  
16 group exercise interventions for people with dementia. The categories that will be used in the  
17 presentation of data are year of publication, author(s), country, setting, population and sample size,  
18 research design and methods, intervention type, outcome measures, and impact and results.  
19  
20

### 21 **Acknowledgements**

22  
23 The authors acknowledge and thank Senior Medical Librarian Michelle Keba Knecht at Florida  
24 Atlantic University Charles E. Schmidt College of Medicine for her assistance. We thank the family and  
25 patient partners for their work and contribution to this scoping review. Patient partners are Betty Riley,  
26 Vincent Celeste, and David Call; family partners are Nate Riley, Diane Celeste, and Dierdre Lacativa.  
27

### 28 **Contributors**

29  
30 LH and JY conceived the idea. All authors helped to refine the research question and develop the  
31 protocol and methods. HL drafted the manuscript with support from JY, PR, and LH, who made  
32 meaningful contributions. LH edited the final manuscript. All authors approved the final manuscript.  
33

34 **Funding** This work was supported by the Marcus Institute of Integrative Health at FAU Medicine, grant  
35 number 2485.  
36

37 **Competing interests** None declared.  
38

39 **Patient consent for publication** Not required.  
40

41 **Provenance and peer review** Not commissioned, externally peer reviewed.  
42

43 **Open access** This is an open access article distributed in accordance with the Creative Commons  
44 Attribution Non Commercial (CC BY NC 4.0) license, which permits others to distribute, remix, adapt,  
45 build on this work noncommercially, and license their derivative works on different terms, provided the  
46 original work is properly cited, appropriate credit is given, any changes made indicated, and the use is  
47 noncommercial. See <http://creativecommons.org/licenses/by-nc/4.0/>.  
48  
49

### 50 **References**

- 51  
52 1 Emmady PD, Tadi P. Dementia. StatPearls Publishing 2021. [https://www.who.int/news-](https://www.who.int/news-room/fact-sheets/detail/dementia)  
53 [room/fact-sheets/detail/dementia](https://www.who.int/news-room/fact-sheets/detail/dementia) (accessed 17 Jul 2021).  
54

- 1  
2  
3 2 Tible OP, Riese F, Savaskan E, *et al.* Best practice in the management of behavioural and  
4 psychological symptoms of dementia. *Therapeutic advances in neurological disorders*  
5 2017;**10**:297–309. doi:10.1177/1756285617712979  
6
- 7 3 Lam F, Huang M-Z, Liao L-R, *et al.* Physical exercise improves strength, balance, mobility, and  
8 endurance in people with cognitive impairment and dementia: a systematic review. *Journal of*  
9 *physiotherapy* 2018;**64**:4–15. doi:10.1016/J.JPHYS.2017.12.001  
10
- 11 4 Emmady PD, Tadi P. Dementia. *StatPearls* 2021.  
12
- 13 5 Cao Q, Tan CC, Xu W, *et al.* The Prevalence of Dementia: A Systematic Review and Meta-Analysis.  
14 *Journal of Alzheimer's disease : JAD* 2020;**73**:1157–66. doi:10.3233/JAD-191092  
15
- 16 6 Gillis C, Mirzaei F, Potashman M, *et al.* The incidence of mild cognitive impairment: A systematic  
17 review and data synthesis. *Alzheimer's & Dementia : Diagnosis, Assessment & Disease Monitoring*  
18 2019;**11**:248. doi:10.1016/J.DADM.2019.01.004  
19
- 20 7 Langa KM, Levine DA. The diagnosis and management of mild cognitive impairment: a clinical  
21 review. *JAMA* 2014;**312**:2551–61. doi:10.1001/JAMA.2014.13806  
22
- 23 8 Plassman BL, Langa KM, Fisher GG, *et al.* Prevalence of Cognitive Impairment without Dementia  
24 in the United States. *Annals of internal medicine* 2008;**148**:427.  
25
- 26 9 Petersen RC, Smith GE, Waring SC, *et al.* Mild cognitive impairment: clinical characterization and  
27 outcome. *Archives of neurology* 1999;**56**:303–8. doi:10.1001/ARCHNEUR.56.3.303  
28
- 29 10 Campbell NL, Unverzagt F, LaMantia MA, *et al.* Risk Factors for the Progression of Mild Cognitive  
30 Impairment to Dementia. *Clinics in geriatric medicine* 2013;**29**:873.  
31 doi:10.1016/J.CGER.2013.07.009  
32
- 33 11 Ohno Y, Kunisawa N, Shimizu S. Antipsychotic Treatment of Behavioral and Psychological  
34 Symptoms of Dementia (BPSD): Management of Extrapyramidal Side Effects. *Frontiers in*  
35 *pharmacology* 2019;**10**. doi:10.3389/FPHAR.2019.01045  
36
- 37 12 Macfarlane S, O'Connor D. Managing behavioural and psychological symptoms in dementia.  
38 *Australian prescriber* 2016;**39**:123–5. doi:10.18773/AUSTPRESCR.2016.052  
39
- 40 13 Hobson N, Dupuis S, Giangregorio L, *et al.* Perceived Facilitators and Barriers to Exercise Among  
41 Older Adults With Mild Cognitive Impairment and Early Dementia. *Journal of aging and physical*  
42 *activity* 2020;**28**:208–18. doi:10.1123/JAPA.2019-0010  
43
- 44 14 Morris J, Vidoni E, Johnson D, *et al.* Aerobic exercise for Alzheimer's disease: A randomized  
45 controlled pilot trial. *PloS one* 2017;**12**. doi:10.1371/JOURNAL.PONE.0170547  
46
- 47 15 McCaffrey R, Park J, Newman D, *et al.* The effect of chair yoga in older adults with moderate and  
48 severe Alzheimer's disease. *Research in gerontological nursing* 2014;**7**:171–7.  
49 doi:10.3928/19404921-20140218-01  
50
- 51  
52  
53  
54

- 1  
2  
3 16 Hsieh C-C, Lin P-S, Hsu W-C, *et al.* The Effectiveness of a Virtual Reality-Based Tai Chi Exercise on  
4 Cognitive and Physical Function in Older Adults with Cognitive Impairment. *Dementia and*  
5 *Geriatric Cognitive Disorders* 2018;**46**:358–70. doi:10.1159/000494659  
6  
7 17 Lee HS, Park SW, Park YJ. Effects of Physical Activity Programs on the Improvement of Dementia  
8 Symptom: A Meta-Analysis. *BioMed research international* 2016;**2016**.  
9 doi:10.1155/2016/2920146  
10  
11 18 Li X, Guo R, Wei Z, *et al.* Effectiveness of Exercise Programs on Patients with Dementia: A  
12 Systematic Review and Meta-Analysis of Randomized Controlled Trials. *BioMed research*  
13 *international* 2019;**2019**. doi:10.1155/2019/2308475  
14  
15 19 Jia RX, Liang JH, Xu Y, *et al.* Effects of physical activity and exercise on the cognitive function of  
16 patients with Alzheimer disease: a meta-analysis. *BMC geriatrics* 2019;**19**. doi:10.1186/S12877-  
17 019-1175-2  
18  
19 20 Boehm J, Franklin R, Newitt R, *et al.* Barriers and motivators to exercise for older adults: a focus  
20 on those living in rural and remote areas of Australia. *The Australian journal of rural health*  
21 2013;**21**:141–9. doi:10.1111/AJR.12032  
22  
23 21 Logsdon RG, McCurry SM, Pike KC, *et al.* Making Physical Activity Accessible to Older Adults With  
24 Memory Loss: A Feasibility Study. *The Gerontologist* 2009;**49**:S94–9.  
25 doi:10.1093/GERONT/GNP082  
26  
27 22 Balouch S, Rifaat E, Chen HL, *et al.* Social networks and loneliness in people with Alzheimer’s  
28 dementia. *International journal of geriatric psychiatry* 2019;**34**:666–73. doi:10.1002/GPS.5065  
29  
30 23 Courtin E, Knapp M. Social isolation, loneliness and health in old age: a scoping review. *Health &*  
31 *social care in the community* 2017;**25**:799–812. doi:10.1111/HSC.12311  
32  
33 24 Ptomey LT, Willis EA, Greene JL, *et al.* The Feasibility of Group Video Conferencing for Promotion  
34 of Physical Activity in Adolescents With Intellectual and Developmental Disabilities. *American*  
35 *Journal on Intellectual and Developmental Disabilities* 2017;**122**:525–38. doi:10.1352/1944-7558-  
36 122.6.525  
37  
38 25 Valenzuela T, Okubo Y, Woodbury A, *et al.* Adherence to Technology-Based Exercise Programs in  
39 Older Adults: A Systematic Review. *Journal of Geriatric Physical Therapy* 2018;**41**:49–61.  
40 doi:10.1519/JPT.0000000000000095  
41  
42 26 Nawaz A, Skjæret N, Helbostad J, *et al.* Usability and acceptability of balance exergames in older  
43 adults: A scoping review. *Health informatics journal* 2016;**22**:911–31.  
44 doi:10.1177/1460458215598638  
45  
46 27 Galiano-Castillo N, Cantarero-Villanueva I, Fernández-Lao C, *et al.* Telehealth system: A  
47 randomized controlled trial evaluating the impact of an internet-based exercise intervention on  
48 quality of life, pain, muscle strength, and fatigue in breast cancer survivors. *Cancer*  
49 2016;**122**:3166–74. doi:10.1002/CNCR.30172  
50  
51  
52  
53  
54  
55  
56  
57  
58  
59  
60

- 1  
2  
3 28 Swinnen N, Vandenbulcke M, Vancampfort D. Exergames in people with major neurocognitive  
4 disorder: a systematic review. *Disability and Rehabilitation: Assistive Technology* 2020;**1**–14.  
5 doi:10.1080/17483107.2020.1785566  
6  
7 29 Zhao Y, Feng H, Wu X, *et al.* Effectiveness of Exergaming in Improving Cognitive and Physical  
8 Function in People With Mild Cognitive Impairment or Dementia: Systematic Review. *JMIR*  
9 *serious games* 2020;**8**:e16841. doi:10.2196/16841  
10  
11 30 Kim O, Pang Y, Kim J-H. The effectiveness of virtual reality for people with mild cognitive  
12 impairment or dementia: a meta-analysis. *BMC psychiatry* 2019;**19**. doi:10.1186/S12888-019-  
13 2180-X  
14  
15 31 Peters M, Godfrey C, McInerney P, *et al.* Chapter 11: Scoping Reviews. *JBI Manual for Evidence*  
16 *Synthesis* Published Online First: 2020. doi:10.46658/JBIMES-20-12  
17  
18 32 Peters MDJ, Godfrey CM, Khalil H, *et al.* Guidance for conducting systematic scoping reviews.  
19 *International Journal of Evidence-Based Healthcare* 2015;**13**:141–6.  
20 doi:10.1097/XEB.0000000000000050  
21  
22 33 Page MJ, McKenzie JE, Bossuyt PM, *et al.* The PRISMA 2020 statement: An updated guideline for  
23 reporting systematic reviews. *The BMJ* 2021;**372**. doi:10.1136/BMJ.N71  
24  
25  
26  
27  
28  
29  
30  
31  
32  
33  
34  
35  
36  
37  
38  
39  
40  
41  
42  
43  
44  
45  
46  
47  
48  
49  
50  
51  
52  
53  
54  
55  
56  
57  
58  
59  
60

## Appendix I: Search Strategy

We have worked with and will continue to work with a medical librarian at the university to alter the search strategy to ensure that relevant articles are found.

We will follow the three-step approach methodology delineated by the Joanna Briggs Institute Scoping Review Guidelines.

Step 1: The preliminary search included two online databases relevant to the topic:

PubMed/MEDLINE and Embase.

Example Preliminary Embase Search:

| #  | Searches                                                                                                                                     | Results  |
|----|----------------------------------------------------------------------------------------------------------------------------------------------|----------|
| S1 | Dementia or (Alzheimer disease)                                                                                                              | 193,282  |
| S2 | (web-based intervention) OR (exergaming) OR (exergame) OR (virtual reality) OR (technology-based intervention) OR telehealth OR telemedicine | 46,382   |
| S3 | Exercise OR (physical activity)                                                                                                              | 509, 456 |
| S4 | S1 AND S2 AND S3                                                                                                                             | 38       |

The initial search will be followed by an analysis of words contained in the titles and abstracts of retrieved papers, as well as index terms used to describe the articles.

Step 2: Using identified keywords and index terms, a second search will be undertaken across all selected databases: MEDLINE/PubMed, CINAHL, Web of Science, Embase, Cochrane Library, and PsychInfo.

Example PubMed Search:

| #  | Search: 7/9/21                                                                   | Results         |
|----|----------------------------------------------------------------------------------|-----------------|
| S1 | (Dementia) OR (Alzheimer) OR (Cognitive impairment) OR (Neurocognitive disorder) | 424,743 results |

|    |                                                                                                                                                                                                                                 |                 |
|----|---------------------------------------------------------------------------------------------------------------------------------------------------------------------------------------------------------------------------------|-----------------|
| S2 | (Online-based intervention) OR (web-based intervention) OR (internet-based intervention) OR (exergaming or exergame) OR (virtual reality) OR (technology-based intervention) OR telehealth OR (remote delivery) OR telemedicine | 79,124 results  |
| S3 | Exercise OR (physical activity) OR (exercise intervention) OR (exercise therapy)                                                                                                                                                | 633,929 results |
| S4 | S1 AND S2 AND S3                                                                                                                                                                                                                | 241             |

2a. Search terms and combinations in step 2:

| Dementia terms          | Technology terms            | Exercise terms        |
|-------------------------|-----------------------------|-----------------------|
| Dementia                | Online-based intervention   | Exercise              |
| Alzheimer               | Web-based intervention      | Physical activity     |
| Cognitive impairment    | Internet-based intervention | Exercise intervention |
| Neurocognitive disorder | Exergaming                  | Exercise therapy      |
|                         | Exergame                    |                       |
|                         | Virtual reality             |                       |
|                         | Technology-based            |                       |
|                         | Telehealth                  |                       |
|                         | Telemedicine                |                       |
|                         | Remote delivery             |                       |

1  
2  
3 2b. Google, Web of Science, and Embase will be used to search grey literature. The Google,  
4 Web of Science, and Embase searches will be performed using the following terms: (dementia  
5 OR Alzheimer OR cognitive impairment OR neurocognitive disorder) AND (online OR web OR  
6 internet OR exergame OR virtual reality OR technology-based OR technology-based OR  
7 telehealth OR telemedicine OR remote delivery) AND (exercise OR physical activity OR  
8 exercise intervention OR exercise therapy)  
9

10  
11  
12 Step 3: The reference lists of all included studies and articles will be searched for additional  
13 relevant studies. Google Scholar will be used to find published articles and related studies.  
14  
15  
16  
17  
18  
19  
20  
21  
22  
23  
24  
25  
26  
27  
28  
29  
30  
31  
32  
33  
34  
35  
36  
37  
38  
39  
40  
41  
42  
43  
44  
45  
46  
47  
48  
49  
50  
51  
52  
53  
54  
55  
56  
57  
58  
59  
60

**Appendix II: Data Extraction Instrument**

| Author, Year, Country | Aim | Population, Sample Size, setting | Research Design and Methods | Intervention Type | Outcome Measures | Impact and results |
|-----------------------|-----|----------------------------------|-----------------------------|-------------------|------------------|--------------------|
|                       |     |                                  |                             |                   |                  |                    |
|                       |     |                                  |                             |                   |                  |                    |

For peer review only



## Preferred Reporting Items for Systematic reviews and Meta-Analyses extension for Scoping Reviews (PRISMA-ScR) Checklist

| SECTION                           | ITEM | PRISMA-ScR CHECKLIST ITEM                                                                                                                                                                                                                                                 | REPORTED ON PAGE #                                                                                                                                        |
|-----------------------------------|------|---------------------------------------------------------------------------------------------------------------------------------------------------------------------------------------------------------------------------------------------------------------------------|-----------------------------------------------------------------------------------------------------------------------------------------------------------|
| <b>TITLE</b>                      |      |                                                                                                                                                                                                                                                                           |                                                                                                                                                           |
| Title                             | 1    | Identify the report as a scoping review.                                                                                                                                                                                                                                  | P.1 title                                                                                                                                                 |
| <b>ABSTRACT</b>                   |      |                                                                                                                                                                                                                                                                           |                                                                                                                                                           |
| Structured summary                | 2    | Provide a structured summary that includes (as applicable): background, objectives, eligibility criteria, sources of evidence, charting methods, results, and conclusions that relate to the review questions and objectives.                                             | P.2 Abstract and article summary                                                                                                                          |
| <b>INTRODUCTION</b>               |      |                                                                                                                                                                                                                                                                           |                                                                                                                                                           |
| Rationale                         | 3    | Describe the rationale for the review in the context of what is already known. Explain why the review questions/objectives lend themselves to a scoping review approach.                                                                                                  | P.3-5 Introduction                                                                                                                                        |
| Objectives                        | 4    | Provide an explicit statement of the questions and objectives being addressed with reference to their key elements (e.g., population or participants, concepts, and context) or other relevant key elements used to conceptualize the review questions and/or objectives. | P. 5-7 Study objective, population, concepts, and context, review question                                                                                |
| <b>METHODS</b>                    |      |                                                                                                                                                                                                                                                                           |                                                                                                                                                           |
| Protocol and registration         | 5    | Indicate whether a review protocol exists; state if and where it can be accessed (e.g., a Web address); and if available, provide registration information, including the registration number.                                                                            | This article is the protocol for the scoping review                                                                                                       |
| Eligibility criteria              | 6    | Specify characteristics of the sources of evidence used as eligibility criteria (e.g., years considered, language, and publication status), and provide a rationale.                                                                                                      | P. 7 inclusion criteria                                                                                                                                   |
| Information sources*              | 7    | Describe all information sources in the search (e.g., databases with dates of coverage and contact with authors to identify additional sources), as well as the date the most recent search was executed.                                                                 | P. 8-9 Type of studies, information sources, search strategy<br>Supplementary file 1, a sample of literature search with Boolean operators and truncation |
| Search                            | 8    | Present the full electronic search strategy for at least 1 database, including any limits used, such that it could be repeated.                                                                                                                                           | Supplementary file 1                                                                                                                                      |
| Selection of sources of evidence† | 9    | State the process for selecting sources of evidence (i.e., screening and eligibility) included in the scoping review.                                                                                                                                                     | P. 9 Study selection                                                                                                                                      |
| Data charting process‡            | 10   | Describe the methods of charting data from the included sources of evidence (e.g., calibrated forms or forms that have been tested by the team before their use, and whether data charting was done independently or in duplicate) and any                                | P.10 Data extraction, supplementary file 2 – data extraction instrument                                                                                   |



|                                                       |    |                                                                                                                                                                                                       |                                                                                |
|-------------------------------------------------------|----|-------------------------------------------------------------------------------------------------------------------------------------------------------------------------------------------------------|--------------------------------------------------------------------------------|
|                                                       |    | processes for obtaining and confirming data from investigators.                                                                                                                                       |                                                                                |
| Data items                                            | 11 | List and define all variables for which data were sought and any assumptions and simplifications made.                                                                                                | P. 11, Data analysis and presentation                                          |
| Critical appraisal of individual sources of evidence§ | 12 | If done, provide a rationale for conducting a critical appraisal of included sources of evidence; describe the methods used and how this information was used in any data synthesis (if appropriate). | NA. Quality appraisal will not be performed on studies in this scoping review. |
| Synthesis of results                                  | 13 | Describe the methods of handling and summarizing the data that were charted.                                                                                                                          | To be conducted in the scoping review                                          |
| <b>RESULTS</b>                                        |    |                                                                                                                                                                                                       |                                                                                |
| Selection of sources of evidence                      | 14 | Give numbers of sources of evidence screened, assessed for eligibility, and included in the review, with reasons for exclusions at each stage, ideally using a flow diagram.                          | To be conducted in the scoping review                                          |
| Characteristics of sources of evidence                | 15 | For each source of evidence, present characteristics for which data were charted and provide the citations.                                                                                           | To be conducted in the scoping review                                          |
| Critical appraisal within sources of evidence         | 16 | If done, present data on critical appraisal of included sources of evidence (see item 12).                                                                                                            | N/A                                                                            |
| Results of individual sources of evidence             | 17 | For each included source of evidence, present the relevant data that were charted that relate to the review questions and objectives.                                                                 | To be conducted in the scoping review                                          |
| Synthesis of results                                  | 18 | Summarize and/or present the charting results as they relate to the review questions and objectives.                                                                                                  | To be conducted in the scoping review                                          |
| <b>DISCUSSION</b>                                     |    |                                                                                                                                                                                                       |                                                                                |
| Summary of evidence                                   | 19 | Summarize the main results (including an overview of concepts, themes, and types of evidence available), link to the review questions and objectives, and consider the relevance to key groups.       | To be conducted in the scoping review                                          |
| Limitations                                           | 20 | Discuss the limitations of the scoping review process.                                                                                                                                                | P.3                                                                            |
| Conclusions                                           | 21 | Provide a general interpretation of the results with respect to the review questions and objectives, as well as potential implications and/or next steps.                                             | To be conducted in the scoping review                                          |
| <b>FUNDING</b>                                        |    |                                                                                                                                                                                                       |                                                                                |
| Funding                                               | 22 | Describe sources of funding for the included sources of evidence, as well as sources of funding for the scoping review. Describe the role of the funders of the scoping review.                       | P.12                                                                           |

JBI = Joanna Briggs Institute; PRISMA-ScR = Preferred Reporting Items for Systematic reviews and Meta-Analyses extension for Scoping Reviews.

\* Where *sources of evidence* (see second footnote) are compiled from, such as bibliographic databases, social media platforms, and Web sites.

† A more inclusive/heterogeneous term used to account for the different types of evidence or data sources (e.g., quantitative and/or qualitative research, expert opinion, and policy documents) that may be eligible in a scoping review as opposed to only studies. This is not to be confused with *information sources* (see first footnote).



1  
2  
3 ‡ The frameworks by Arksey and O'Malley (6) and Levac and colleagues (7) and the JBI guidance (4, 5) refer to the  
4 process of data extraction in a scoping review as data charting.  
5 § The process of systematically examining research evidence to assess its validity, results, and relevance before  
6 using it to inform a decision. This term is used for items 12 and 19 instead of "risk of bias" (which is more applicable  
7 to systematic reviews of interventions) to include and acknowledge the various sources of evidence that may be used  
8 in a scoping review (e.g., quantitative and/or qualitative research, expert opinion, and policy document).  
9

10  
11 *From:* Tricco AC, Lillie E, Zarin W, O'Brien KK, Colquhoun H, Levac D, et al. PRISMA Extension for Scoping Reviews (PRISMA-  
12 ScR): Checklist and Explanation. *Ann Intern Med.* ;169:467–473. doi: 10.7326/M18-0850  
13  
14  
15  
16  
17  
18  
19  
20  
21  
22  
23  
24  
25  
26  
27  
28  
29  
30  
31  
32  
33  
34  
35  
36  
37  
38  
39  
40  
41  
42  
43  
44  
45  
46  
47  
48  
49  
50  
51  
52  
53  
54  
55  
56  
57

For peer review only

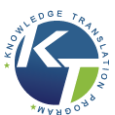

Supplement: bmjopen-2021-055990.draft_revisions.pdf [file bmjopen-2021-055990.draft_revisions.pdf]
