# Supplementary material for: Technology-based group exercise interventions for people living with dementia or mild cognitive impairment: a scoping review protocol
Source: PubMed Central journal article supplement — BMJ Open. 2022 Mar 28;12(3):e055990. doi: 10.1136/bmjopen-2021-055990 (PMC8961146; doi:10.1136/bmjopen-2021-055990), 2022-03-28
Supplement: bmjopen-2021-055990supp001.pdf [file bmjopen-2021-055990supp001.pdf]

## Appendix I: Search Strategy

We have worked with and will continue to work with a medical librarian at the university to alter the search strategy to ensure that relevant articles are found.

We will follow the three-step approach methodology delineated by the Joanna Briggs Institute Scoping Review Guidelines.

Step 1: The preliminary search included two online databases relevant to the topic:

PubMed/MEDLINE and Embase.

Example Preliminary Embase Search:

| #  | Searches                                                                                                                                     | Results |
|----|----------------------------------------------------------------------------------------------------------------------------------------------|---------|
| S1 | Dementia or (Alzheimer disease)                                                                                                              | 193,282 |
| S2 | (web-based intervention) OR (exergaming) OR (exergame) OR (virtual reality) OR (technology-based intervention) OR telehealth OR telemedicine | 46,382  |
| S3 | Exercise OR (physical activity)                                                                                                              | 509,456 |
| S4 | S1 AND S2 AND S3                                                                                                                             | 38      |

The initial search will be followed by an analysis of words contained in the titles and abstracts of retrieved papers, as well as index terms used to describe the articles.

Step 2: Using identified keywords and index terms, a second search will be undertaken across all selected databases: MEDLINE/PubMed, CINAHL, Web of Science, Embase, Cochrane Library, and PsychInfo.

Example PubMed Search:

| #  | Search: 7/9/21                                                                   | Results         |
|----|----------------------------------------------------------------------------------|-----------------|
| S1 | (Dementia) OR (Alzheimer) OR (Cognitive impairment) OR (Neurocognitive disorder) | 424,743 results |

|    |                                                                                                                                                                                                                                 |                 |
|----|---------------------------------------------------------------------------------------------------------------------------------------------------------------------------------------------------------------------------------|-----------------|
| S2 | (Online-based intervention) OR (web-based intervention) OR (internet-based intervention) OR (exergaming or exergame) OR (virtual reality) OR (technology-based intervention) OR telehealth OR (remote delivery) OR telemedicine | 79,124 results  |
| S3 | Exercise OR (physical activity) OR (exercise intervention) OR (exercise therapy)                                                                                                                                                | 633,929 results |
| S4 | S1 AND S2 AND S3                                                                                                                                                                                                                | 241             |

## 2a. Search terms and combinations in step 2:

| Dementia terms          | Technology terms            | Exercise terms        |
|-------------------------|-----------------------------|-----------------------|
| Dementia                | Online-based intervention   | Exercise              |
| Alzheimer               | Web-based intervention      | Physical activity     |
| Cognitive impairment    | Internet-based intervention | Exercise intervention |
| Neurocognitive disorder | Exergaming                  | Exercise therapy      |
|                         | Exergame                    |                       |
|                         | Virtual reality             |                       |
|                         | Technology-based            |                       |
|                         | Telehealth                  |                       |
|                         | Telemedicine                |                       |
|                         | Remote delivery             |                       |

2b. Google, Web of Science, and Embase will be used to search grey literature. The Google, Web of Science, and Embase searches will be performed using the following terms: (dementia OR Alzheimer OR cognitive impairment OR neurocognitive disorder) AND (online OR web OR internet OR exergame OR virtual reality OR technology-based OR technology-based OR telehealth OR telemedicine OR remote delivery) AND (exercise OR physical activity OR exercise intervention OR exercise therapy)

Step 3: The reference lists of all included studies and articles will be searched for additional relevant studies. Google Scholar will be used to find published articles and related studies.
