# Supplementary material for: Technology-based group exercise interventions for people living with dementia or mild cognitive impairment: a scoping review protocol
Source: PubMed Central journal article supplement — BMJ Open. 2022 Mar 28;12(3):e055990. doi: 10.1136/bmjopen-2021-055990 (PMC8961146; doi:10.1136/bmjopen-2021-055990), 2022-03-28
Supplement: bmjopen-2021-055990supp002.pdf [file bmjopen-2021-055990supp002.pdf]

**Appendix II: Data Extraction Instrument**

| Author, Year, Country | Aim | Population, Sample Size, setting | Research Design and Methods | Intervention Type | Outcome Measures | Impact and results |
|-----------------------|-----|----------------------------------|-----------------------------|-------------------|------------------|--------------------|
|                       |     |                                  |                             |                   |                  |                    |
|                       |     |                                  |                             |                   |                  |                    |
